# Supplementary material for: Synergistic anti-cancer effects via co-delivery of TNF-related apoptosis-inducing ligand (TRAIL/Apo2L) and doxorubicin using micellar nanoparticles
Source: Royal Society of Chemistry journal article supplement (doi:10.1039/c0mb00266f), 2011-02-24
Supplement: c0mb00266f.pdf [file c0mb00266f.pdf]

### Supplementary Information

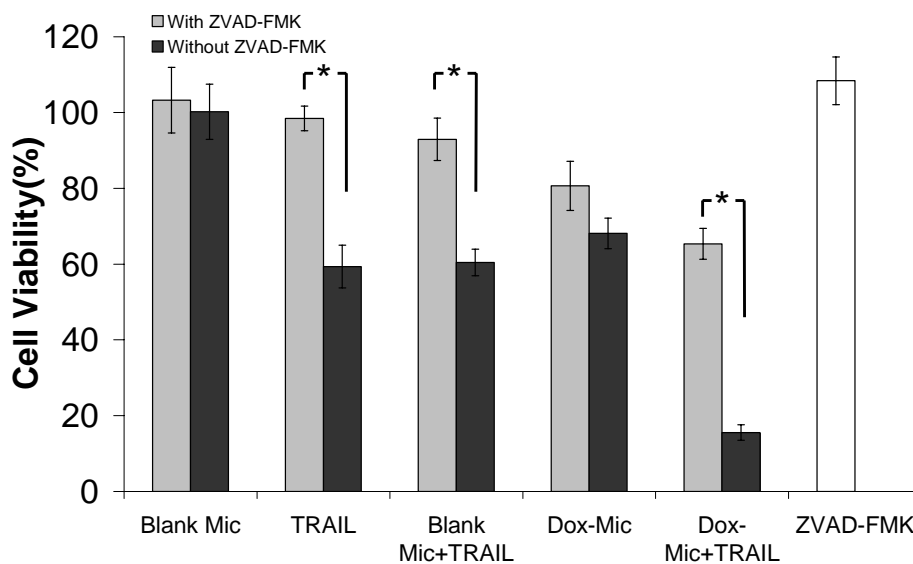

**Figure S1.** Viability of parental SW480 cells in the presence or absence of pan-caspase inhibitor ZVAD-FMK pretreatment (50  $\mu$ M) prior to 48 hour incubation with nanocomplexes. P(MDS-*co*-CES) and TRAIL concentrations were fixed at 5 mg/l and 10 nM respectively. Dox loading level: 8.6%. Cell culture was performed in serum-containing medium. The error bars represent the mean  $\pm$  S.D. (n=3).

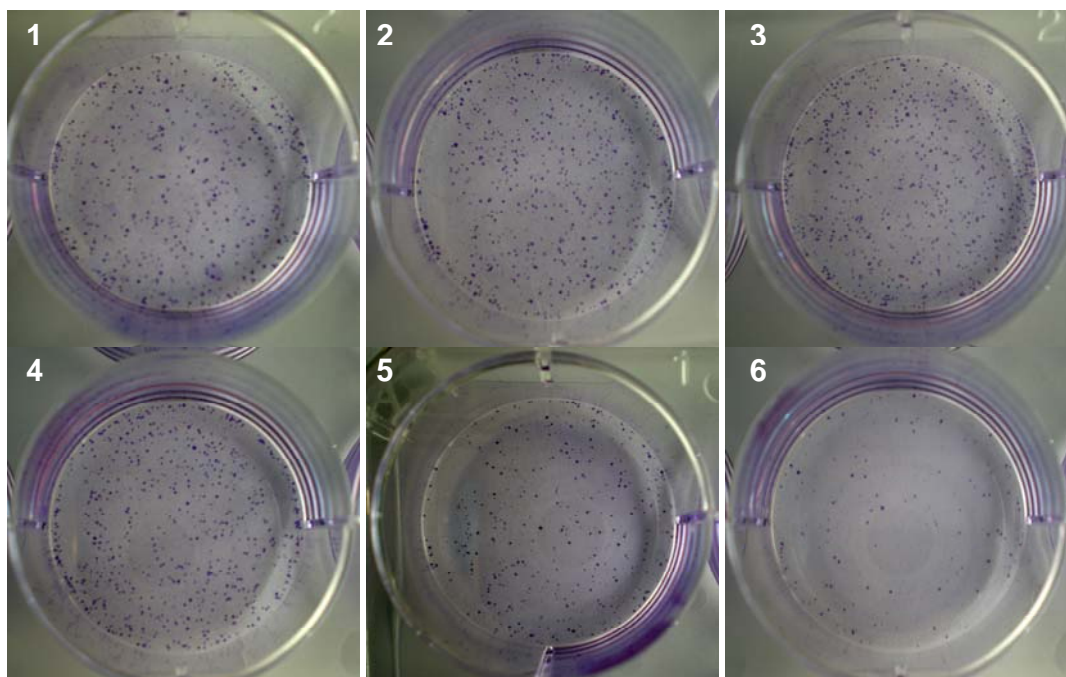

**Figure S2.** Images of SW480 colony taken at Day 9 subsequent to 48 hours treatment with (1) control, (2) blank nanoparticles, (3) TRAIL, (4) nanoparticle/TRAIL complexes, (5) Dox-loaded nanoparticles and (6) Dox-loaded nanoparticle/TRAIL complexes. P(MDS-*co*-CES) and TRAIL were fixed at 1 mg/l and 10 nM respectively. Dox loading level = 8.6%. Colonies were stained with 0.5% w/v crystal violet.
